# Supplementary figures and images for: LncRNA 8244-ssc-miR-320-CCR7 Regulates IFN-β during SVA Infecting PK-15 Cells
Source: MDPI journal article supplement (doi:10.3390/microorganisms11030688), 2023-03-08

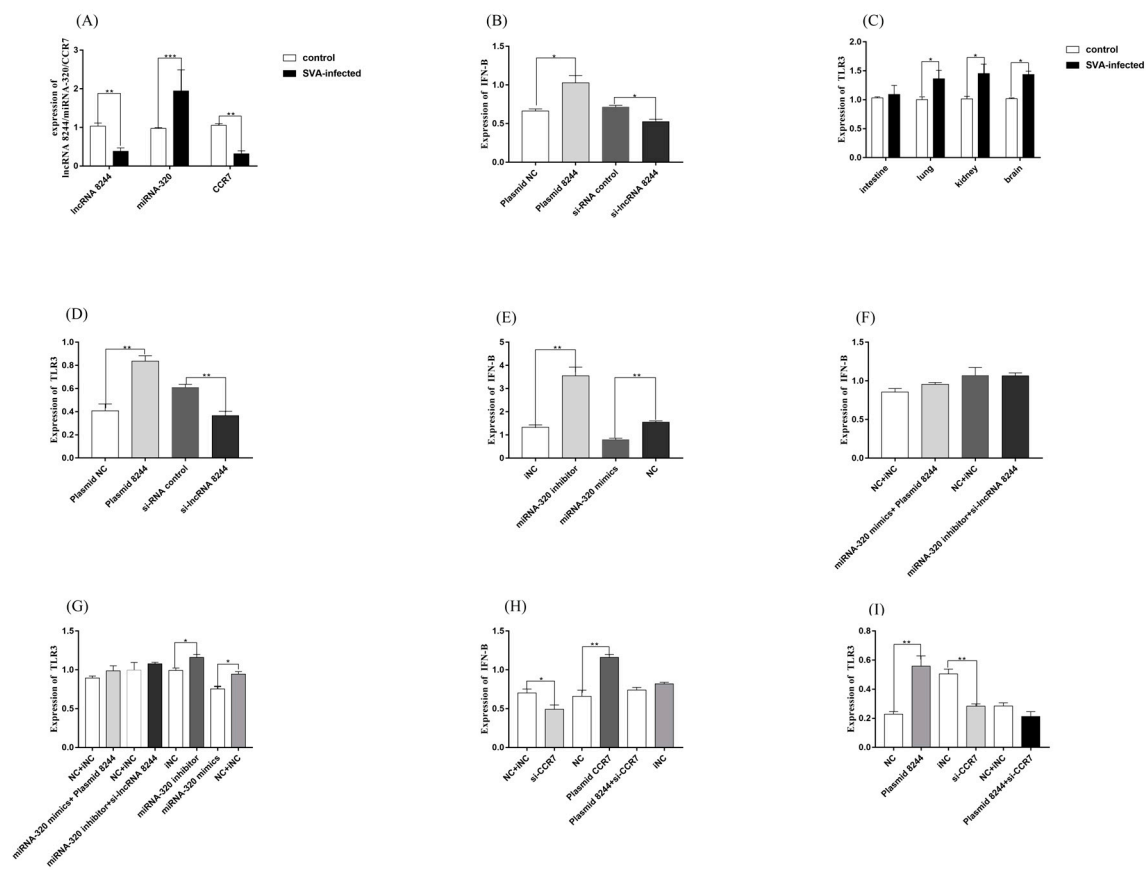

Supplement: s1 [file s1]
